# Supplementary material for: Parental stress, depression, anxiety and participation to care in neonatal intensive care units: results of a prospective study in Italy, Brazil and Tanzania
Source: PubMed Central journal article supplement — BMJ Paediatr Open. 2024 Aug 3;8(Suppl 2):e002539. doi: 10.1136/bmjpo-2024-002539 (PMC11664376; doi:10.1136/bmjpo-2024-002539), 2024-08-03
Supplement: bmjpo-8-Suppl_2-s001.pdf [file bmjpo-8-Suppl_2-s001.pdf]

Parental stress, depression, anxiety and participation to care in  
Neonatal Intensive Care Units: results of a prospective study in  
Italy, Brazil, and Tanzania

Supplementary tables and figures

Supp. Table 1. STROBE checklist

|                              | Item No | Recommendation                                                                                                                                                                       | Page No |
|------------------------------|---------|--------------------------------------------------------------------------------------------------------------------------------------------------------------------------------------|---------|
| Title and abstract           | 1       | (a) Indicate the study's design with a commonly used term in the title or the abstract                                                                                               | 1,3     |
|                              |         | (b) Provide in the abstract an informative and balanced summary of what was done and what was found                                                                                  | 3       |
| Introduction                 |         |                                                                                                                                                                                      |         |
| Background/rationale         | 2       | Explain the scientific background and rationale for the investigation being reported                                                                                                 | 5,6     |
| Objectives                   | 3       | State specific objectives, including any prespecified hypotheses                                                                                                                     | 6       |
| Methods                      |         |                                                                                                                                                                                      |         |
| Study design                 | 4       | Present key elements of study design early in the paper                                                                                                                              | 6       |
| Setting                      | 5       | Describe the setting, locations, and relevant dates, including periods of recruitment, exposure, follow-up, and data collection                                                      | 6       |
| Participants                 | 6       | (a) Give the eligibility criteria, and the sources and methods of selection of participants                                                                                          | 6,7     |
| Variables                    | 7       | Clearly define all outcomes, exposures, predictors, potential confounders, and effect modifiers. Give diagnostic criteria, if applicable                                             | 7 to 11 |
| Data sources/<br>measurement | 8*      | For each variable of interest, give sources of data and details of methods of assessment (measurement). Describe comparability of assessment methods if there is more than one group | 7 to 11 |
| Bias                         | 9       | Describe any efforts to address potential sources of bias                                                                                                                            | 10,11   |
| Study size                   | 10      | Explain how the study size was arrived at                                                                                                                                            | 10      |
| Quantitative variables       | 11      | Explain how quantitative variables were handled in the analyses. If applicable, describe which groupings were chosen and why                                                         | 7 to 11 |
| Statistical methods          | 12      | (a) Describe all statistical methods, including those used to control for confounding                                                                                                | 10,11   |
|                              |         | (b) Describe any methods used to examine subgroups and interactions                                                                                                                  | 10,11   |
|                              |         | (c) Explain how missing data were addressed                                                                                                                                          | Fig. 1  |
|                              |         | (d) If applicable, describe analytical methods taking account of sampling strategy                                                                                                   | -       |
|                              |         | (e) Describe any sensitivity analyses                                                                                                                                                | -       |
| Results                      |         |                                                                                                                                                                                      |         |

|                   |     |                                                                                                                                                                                                              |               |
|-------------------|-----|--------------------------------------------------------------------------------------------------------------------------------------------------------------------------------------------------------------|---------------|
| Participants      | 13* | (a) Report numbers of individuals at each stage of study—eg numbers potentially eligible, examined for eligibility, confirmed eligible, included in the study, completing follow-up, and analysed            | 11,12         |
|                   |     | (b) Give reasons for non-participation at each stage                                                                                                                                                         | 11,12, Fig. 1 |
|                   |     | (c) Consider use of a flow diagram                                                                                                                                                                           | Fig.1         |
| Descriptive data  | 14* | (a) Give characteristics of study participants (eg demographic, clinical, social) and information on exposures and potential confounders                                                                     | 11,12         |
|                   |     | (b) Indicate number of participants with missing data for each variable of interest                                                                                                                          | 11,12, Fig. 1 |
| Outcome data      | 15* | Report numbers of outcome events or summary measures                                                                                                                                                         | 11,12,13      |
| Main results      | 16  | (a) Give unadjusted estimates and, if applicable, confounder-adjusted estimates and their precision (eg, 95% confidence interval). Make clear which confounders were adjusted for and why they were included | 11,12,13      |
|                   |     | (b) Report category boundaries when continuous variables were categorized                                                                                                                                    | 11,12,13      |
|                   |     | (c) If relevant, consider translating estimates of relative risk into absolute risk for a meaningful time period                                                                                             | -             |
| Other analyses    | 17  | Report other analyses done—eg analyses of subgroups and interactions, and sensitivity analyses                                                                                                               | 14            |
| Discussion        |     |                                                                                                                                                                                                              |               |
| Key results       | 18  | Summarise key results with reference to study objectives                                                                                                                                                     | 14, 15        |
| Limitations       | 19  | Discuss limitations of the study, taking into account sources of potential bias or imprecision. Discuss both direction and magnitude of any potential bias                                                   | 15, 16        |
| Interpretation    | 20  | Give a cautious overall interpretation of results considering objectives, limitations, multiplicity of analyses, results from similar studies, and other relevant evidence                                   | 14,15,16      |
| Generalisability  | 21  | Discuss the generalisability (external validity) of the study results                                                                                                                                        | 15            |
| Other information |     |                                                                                                                                                                                                              |               |
| Funding           | 22  | Give the source of funding and the role of the funders for the present study and, if applicable, for the original study on which the present article is based                                                | 17            |

\*Give information separately for exposed and unexposed groups.

Note: An Explanation and Elaboration article discusses each checklist item and gives methodological background and published examples of transparent reporting. The STROBE checklist is best used in conjunction with this article (freely available on the Web sites of PLoS Medicine at <http://www.plosmedicine.org/>, Annals of Internal Medicine at <http://www.annals.org/>, and Epidemiology at <http://www.epidem.com/>). Information on the STROBE Initiative is available at [www.strobe-statement.org](http://www.strobe-statement.org).

Supp. Table 2. Hospitals characteristics

| Hospital                                                                                 | Country  | Level of care provided | Teaching Hospital | Administration             | Live births <sup>1</sup> | Number of beds |                     |                      |
|------------------------------------------------------------------------------------------|----------|------------------------|-------------------|----------------------------|--------------------------|----------------|---------------------|----------------------|
|                                                                                          |          |                        |                   |                            |                          | Intensive care | Semi-intensive care | Kangaroo mother care |
| Institute for Maternal and Child Health IRCCS “Burlo Garofolo                            | Italy    | Tertiary               | Yes               | public                     | 140-160/month            | 10             | 12                  | 0                    |
| Tosamaganga Hospital                                                                     | Tanzania | Tertiary               | Yes               | public                     | 240-260/month            | 0              | variable            | 3                    |
| Instituto de Medicina Integral - Prof Fernando Figueira (IMIP)                           | Brazil   | Tertiary               | Yes               | private /philanthropic     | 400-420/month            | 20             | 10                  | 10                   |
| Hospital das Clínicas – University hospital of Universidade Federal de Pernambuco (UFPE) | Brazil   | Tertiary               | Yes               | public- federal government | 180-200/month            | 8              | 5                   | 5                    |
| Barão de Lucena Hospital                                                                 | Brazil   | Tertiary               | Yes               | public- state government   | 400-420/month            | 18             | 22                  | 10                   |
| Centro Integrado de Saúde Amaury de Medeiros (CISAM)/University of Pernambuco (UPE)      | Brazil   | Tertiary               | Yes               | public- state government   | 340-360/month            | 10             | 15                  | 7                    |

|                             |        |           |     |                          |                |    |    |   |
|-----------------------------|--------|-----------|-----|--------------------------|----------------|----|----|---|
| Agamenon Magalhães Hospital | Brazil | Tertiary  | Yes | public- state government | 400/month      | 15 | 15 | 8 |
| Maria Lucinda Hospital      | Brazil | Secondary | Yes | public- state government | 0 <sup>2</sup> |    |    |   |

1 Based on average observed in year 2019, 2020 and 2021 (approximated)

2 No maternity hospital, only NICU.

Supp. Table 3. Parents' characteristics

|                                                  | Brazil      | Italy       | Tanzania    | p-value <sup>0</sup> |
|--------------------------------------------------|-------------|-------------|-------------|----------------------|
|                                                  | N=327       | N=191       | N=224       |                      |
|                                                  | n (%)       | n (%)       | n (%)       |                      |
| Parental age (Median [IQR])                      | 27 [22, 32] | 37 [34, 41] | 25 [21, 30] | <b>&lt; 0.001</b>    |
| Missing                                          | 3 (0.9)     | 0           | 0           |                      |
| Working status                                   |             |             |             | <b>&lt; 0.001</b>    |
| Housewife/Unemployed                             | 198 (60.6)  | 20 (10.4)   | 40 (17.9)   |                      |
| Working                                          | 127 (38.8)  | 167 (87.4)  | 183 (81.7)  |                      |
| No data                                          | 2 (0.6)     | 4 (2.1)     | 1 (0.4)     |                      |
| Marital status                                   |             |             |             | <b>&lt; 0.001</b>    |
| Married                                          | 114 (34.9)  | 89 (46.6)   | 164 (73.2)  |                      |
| Un-married                                       | 135 (41.3)  | 5 (2.6)     | 57 (25.4)   |                      |
| Unmarried living together                        | 74 (22.6)   | 97 (50.8)   | 2 (0.9)     |                      |
| Missing                                          | 4 (1.2)     | 0           | 1 (0.4)     |                      |
| Education ISCED <sup>1</sup>                     |             |             |             | <b>&lt; 0.001</b>    |
| 0-1 (No schooling or Primary ed.)                | 4 (1.2)     | 0           | 145 (64.7)  |                      |
| 2-3 (Lower secondary ed. or Upper secondary ed.) | 288 (88.1)  | 108 (56.5)  | 72 (32.1)   |                      |
| 4-5-6 (Higher ed. and post-graduation)           | 35 (10.7)   | 81 (42.4)   | 7 (3.1)     |                      |
| Missing                                          | 0           | 2 (1)       | 0           |                      |
| Parity (data collected only for mothers)         |             |             |             | <b>0.003</b>         |
| 1                                                | 161 (49.2)  | 63 (56.3)   | 51 (22.8)   |                      |
| 2                                                | 82 (25.1)   | 28 (25)     | 16 (7.1)    |                      |
| >2                                               | 59 (18)     | 20 (17.9)   | 38 (17.0)   |                      |
| Missing                                          | 25 (7.6)    | 1 (0.9)     | 113 (50.4)  |                      |

Notes: 0- For the chi-squared test comparing the different proportions, 'missing' levels were not considered because they have almost zero values; 1- Imperfect match for Brazilian standards used in the local questionnaire.

Abbreviations: IQR = interquartile range, ISCED: International Standard Classification of Education.

Supp. Table 4. Newborns' characteristics

|                                                       | Brazil      | Italy        | Tanzania <sup>2</sup> | p-value |
|-------------------------------------------------------|-------------|--------------|-----------------------|---------|
|                                                       | N=327       | N=123        | N=224                 |         |
|                                                       | n (%)       | n (%)        | n (%)                 |         |
| <b>Sex</b>                                            |             |              |                       |         |
| Female                                                | 160 (48.9)  | 63 (51.2)    | 114 (50.9)            | 0.916   |
| Male                                                  | 163 (49.8)  | 60 (48.8)    | 109 (48.7)            |         |
| Missing                                               | 4 (1.2)     | 0            | 1 (0.4)               |         |
| <b>Gestational age at birth (weeks)</b>               |             |              |                       |         |
| ≤27                                                   | 21 (6.4)    | 6 (4.9)      | 8 (3.6)               | < 0.001 |
| 28-33                                                 | 165 (50.5)  | 29 (23.6)    | 33 (14.7)             |         |
| 34-36                                                 | 69 (21.1)   | 41 (33.3)    | 26 (11.6)             |         |
| 37-41                                                 | 70 (21.4)   | 47 (38.2)    | 138 (61.6)            |         |
| ≥42 *                                                 | 0           | 0            | 19 (8.5)              |         |
| <b>Unit</b>                                           |             |              |                       |         |
| NICU                                                  | 219 (67.0)  | 60 (48.8)    | 160 (71.4)            | < 0.001 |
| Semi-intensive care                                   | 103 (31.5)  | 63 (51.2)    | 63 (28.1)             |         |
| Missing                                               | 4 (1.2)     | 0            | 1 (0.4)               |         |
| <b>Apgar at 5th minute &lt;7</b>                      | 26 (8.0)    | 3 (2.4)      | 53 (23.7)             | < 0.001 |
| <b>Bag mask ventilation at birth</b>                  | 145 (44.3)  | 28 (22.8)    | 84 (37.5)             | 0.031   |
| <b>Any respiratory distress<sup>1</sup></b>           | 156 (47.7)  | 58 (47.2)    | 121 (54.0)            | 0.749   |
| <b>Intubation</b>                                     | 95 (29.1)   | 24 (19.5)    | 0 (0.0)               | /       |
| <b>Sepsis</b>                                         | 85 (26.0)   | 16 (13)      | 43 (19.2)             | 0.113   |
| <b>Jaundice <sup>3</sup></b>                          | 235 (71.9)  | 24 (19.5)    | 145 (64.7)            | < 0.001 |
| <b>Major malformation</b>                             | 47 (14.4)   | 8 (6.5)      | 12 (5.4)              | 0.064   |
| <b>Surgery</b>                                        | 44 (13.5)   | 12 (9.8)     | 5 (2.2)               | 0.020   |
| <b>Total hospitalization, days<br/>(Median [IQR])</b> | 29 [18, 47] | 15 [8.5, 26] | 7 [5, 12]             | < 0.001 |
| Missing                                               | 18 (5.5)    | 0            | 1 (0.4)               |         |

Notes: 0- For the chi-squared test comparing the different proportions, 'missing' levels were not considered because they have almost zero values; 1 – both clinical and radiological signs; 2 – second level hospital; 3 – slightly different definitions used

Abbreviations: IQR = interquartile range.



Supp. Table 5A. Frequency of parental depression, anxiety (EPDS-A) and stress

|          |                                              | At least one condition |             | All conditions at once |             |
|----------|----------------------------------------------|------------------------|-------------|------------------------|-------------|
|          |                                              | <i>Frequency</i>       | <i>%</i>    | <i>Frequency</i>       | <i>%</i>    |
| Italy    | Total sample (N = 191)                       | 101                    | <b>52.9</b> | 22                     | <b>11.5</b> |
| Brazil   | Cases with data on all 3 conditions (N= 106) | 69                     | <b>65.1</b> | 17                     | <b>16.0</b> |
|          | Total sample (N = 327)                       | 225                    | 68.8        |                        | 5.2         |
| Tanzania | Total sample (N = 224)                       | 130                    | <b>58.0</b> | 4                      | <b>1.8</b>  |

Notes: predefined cut off: Depression: EPDS  $\geq$  12 for Italy and  $\geq$  13 for Brazil and Tanzania; Anxiety: EPDS-A  $\geq$  6; Stress: SOL  $\geq$  3.

Abbreviations: EPDS = Edinburgh Postnatal Depression Scale; EPDS-A = Edinburgh Postnatal Depression Scale for Anxiety; SOL = Stress Occurrence Level.

Supp. Table 5B. Frequency of parental depression, anxiety (STAI) and stress

|        |                                               | At least one condition |             | All conditions at once |             |
|--------|-----------------------------------------------|------------------------|-------------|------------------------|-------------|
|        |                                               | <i>Frequency</i>       | <i>%</i>    | <i>Frequency</i>       | <i>%</i>    |
| Italy  | Cases with data on all 3 conditions (N = 130) | 82                     | <b>63.1</b> | 17                     | <b>13.1</b> |
|        | Total sample (N = 191)                        | 119                    | 62.3        |                        | 8.9         |
| Brazil | Cases with data on all 3 conditions (N= 106)  | 74                     | <b>69.8</b> | 11                     | <b>10.4</b> |
|        | Total sample (N = 327)                        | 230                    | 70.3        |                        | 3.4         |

Notes: predefined cut off: Depression: EPDS  $\geq$  12 for Italy and  $\geq$  13 for Brazil and Tanzania; Anxiety: STAI state > 40; Stress: SOL  $\geq$  3.

Abbreviations: EPDS = Edinburgh Postnatal Depression Scale; STAI = State-Trait Anxiety Inventory; SOL = Stress Occurrence Level. STAI score was not collected in Tanzania.

Supp. Table 6. Frequency of depression, anxiety and stress in the three countries

|          |                             | EPDS         |      | EPDS-A   |      | STAI         |      |              |      | PSS:NICU   |      |            |      |
|----------|-----------------------------|--------------|------|----------|------|--------------|------|--------------|------|------------|------|------------|------|
|          |                             |              |      |          |      | <i>State</i> |      | <i>Trait</i> |      | <i>OSL</i> |      | <i>SOL</i> |      |
|          |                             | $\geq 12/13$ | %    | $\geq 6$ | %    | $>40$        | %    | $>40$        | %    | $\geq 3$   | %    | $\geq 3$   | %    |
| Italy    | Total sample for each score | 63           | 33.3 | 46       | 24.3 | 48           | 36.9 | 36           | 27.7 | 13         | 6.8  | 70         | 36.7 |
| Brazil   | Total sample for each score | 38           | 35.8 | 30       | 28.3 | 35           | 59.3 | 69           | 65.1 | 147        | 45.0 | 211        | 64.5 |
| Tanzania | Total sample                | 117          | 52.3 |          |      | /            |      |              |      | 3          | 1.3  | 10         | 4.5  |

Notes: Depression cut-offs: EPDS  $\geq 12$  for Italy and  $\geq 13$  for Brazil and Tanzania. Abbreviations: EPDS = Edinburgh Postnatal Depression Scale; STAI = State-Trait Anxiety Inventory; PSS:NICU = Parental Stressor Scale in NICU; OSL = Overall Stress Level; SOL = Stress Occurrence Level.

Supp. Table 6B. Frequency of severe stress and severe anxiety in Italy and Brazil

|                 | STAI          |          | PSS:NICU   |          |
|-----------------|---------------|----------|------------|----------|
|                 | <i>State</i>  |          | <i>SOL</i> |          |
|                 | <i>&gt;60</i> | <i>%</i> | <i>≥4</i>  | <i>%</i> |
| <b>Italy</b>    | 5             | 3.84     | 6          | 4.69     |
| <b>Brazil</b>   | 3             | 5.04     | 24         | 22.64    |
| <b>Tanzania</b> | /             | /        | 0          | 0        |

Abbreviations: STAI = State-Trait Anxiety Inventory; PSS:NICU = Parental Stressor Scale in NICU; SOL = Stress Occurrence Level.

Supp. Table 7 – Median scores of depression, anxiety and stress in the three countries

|                 | Depression (EPDS) |            | Anxiety (EPDS-A) |            | Anxiety (STAI) |              |               |            | Stress (PSS:NICU) |            |               |            |
|-----------------|-------------------|------------|------------------|------------|----------------|--------------|---------------|------------|-------------------|------------|---------------|------------|
|                 |                   |            |                  |            | State          |              | Trait         |            | OSL               |            | SOL           |            |
|                 | <i>Median</i>     | <i>IQR</i> | <i>Median</i>    | <i>IQR</i> | <i>Median</i>  | <i>IQR</i>   | <i>Median</i> | <i>IQR</i> | <i>Median</i>     | <i>IQR</i> | <i>Median</i> | <i>IQR</i> |
| <b>Italy</b>    | 9                 | [5; 13]    | 3                | [2; 5]     | 37             | [30.0; 46.8] | 35            | [28; 41]   | 1.9               | [1.4; 2.3] | 2.6           | [2; 3.3]   |
| <b>Brazil</b>   | 10                | [6; 15]    | 4                | [2; 6]     | <b>45</b>      | [37.5; 52]   | <b>44</b>     | [37.2; 50] | 2.8               | [2.0; 3.5] | <b>3.4</b>    | [2.6; 4]   |
| <b>Tanzania</b> | <b>13</b>         | [9; 16]    | 4                | [3; 6]     |                |              |               |            | 1.8               | [1.4; 2.1] | 2.1           | [1.6; 2.5] |

Note: In bold median values above the cut-off (EPDS  $\geq$  12/13, STAI  $>$  40, SOL  $\geq$  3), STAI score was not collected in Tanzania.

Abbreviations: IQR = Interquartile range; EPDS = Edinburgh Postnatal Depression Scale; STAI = State-Trait Anxiety Inventory; PSS:NICU = Parental Stressor Scale in NICU; OSL = Overall Stress Level; SOL = Stress Occurrence Level.

Supp. Table 8. Parental participation to care, median scores by domain of IPP-NICU

| Domains                                  | Italy         |            | Brazil        |            | Tanzania      |            |
|------------------------------------------|---------------|------------|---------------|------------|---------------|------------|
|                                          | <i>Median</i> | <i>IQR</i> | <i>Median</i> | <i>IQR</i> | <i>Median</i> | <i>IQR</i> |
| Activities related to daily living (0-6) | 5             | [3; 5.5]   | 4             | [2; 5]     | 5             | [5; 6]     |
| Providing comfort (0-7)                  | 5             | [4; 6]     | 6             | [5; 7]     | 7             | [6; 7]     |
| Advocating for newborn health (0-7)      | 5             | [4; 5.5]   | 5             | [4; 6]     | 5             | [2; 6]     |
| Technical task (0-10)                    | 4             | [2; 7]     | 6             | [4; 8]     | 8             | [7; 9]     |
| <b>IPP-NICU total score (0-30)</b>       | 18            | [12; 22]   | 21            | [15; 24.8] | 24            | [21; 26]   |

Abbreviations: IPP-NICU: Index of paternal participation in NICU; IQR = interquartile range.

Supp. Table 9. Logistic regression models – factors associated with stress in Italy

| Dependent: SOL $\geq$ 3 |                                      | Not stressed | Stressed  | OR (univariate)           | OR (multivariate)                |
|-------------------------|--------------------------------------|--------------|-----------|---------------------------|----------------------------------|
| Newborn sex             | <i>Female</i>                        | 60 (63.8)    | 34 (36.2) | -                         | -                                |
|                         | <i>Male</i>                          | 59 (64.1)    | 33 (35.9) | 0.99 (0.54-1.80, p=0.966) | 0.72 (0.35-1.45, p=0.356)        |
| Twin                    | <i>No</i>                            | 93 (59.6)    | 63 (40.4) | -                         | -                                |
|                         | <i>Yes</i>                           | 26 (86.7)    | 4 (13.3)  | 0.23 (0.06-0.62, p=0.008) | <b>0.24 (0.06-0.71, p=0.018)</b> |
| Intubation              | <i>No</i>                            | 97 (66.0)    | 50 (34.0) | -                         | -                                |
|                         | <i>Yes</i>                           | 22 (56.4)    | 17 (43.6) | 1.50 (0.72-3.07, p=0.270) | 2.10 (0.80-5.83, p=0.139)        |
| Total stay              | <i><math>\leq</math> 14 days</i>     | 57 (65.5)    | 30 (34.5) | -                         | -                                |
|                         | <i><math>&gt;</math> 14 days</i>     | 62 (66.0)    | 32 (34.0) | 0.98 (0.53-1.82, p=0.950) | 0.91 (0.43-1.94, p=0.816)        |
| Weight                  | <i><math>&lt;</math>1500g</i>        | 24 (70.6)    | 10 (29.4) | -                         | -                                |
|                         | <i><math>\geq</math>1500g</i>        | 95 (62.5)    | 57 (37.5) | 1.44 (0.66-3.36, p=0.376) | 2.55 (0.83-8.70, p=0.115)        |
| Education <sup>1</sup>  | <i>Not graduated</i>                 | 75 (68.2)    | 35 (31.8) | -                         | -                                |
|                         | <i>Graduated</i>                     | 44 (57.9)    | 32 (42.1) | 1.56 (0.85-2.87, p=0.152) | 1.90 (0.94-3.87, p=0.075)        |
| Parental age            | <i><math>\geq</math> 35 years</i>    | 90 (68.2)    | 42 (31.8) | -                         | -                                |
|                         | <i><math>&lt;</math> 35 years</i>    | 29 (53.7)    | 25 (46.3) | 1.85 (0.96-3.54, p=0.064) | 1.70 (0.79-3.70, p=0.175)        |
| Working status          | <i>Unemployed</i>                    | 12 (52.2)    | 11 (47.8) | -                         | -                                |
|                         | <i>Employed</i>                      | 107 (65.6)   | 56 (34.4) | 0.57 (0.24-1.39, p=0.212) | 0.87 (0.30-2.58, p=0.794)        |
| Role                    | <i>Father</i>                        | 56 (73.7)    | 20 (26.3) | -                         | -                                |
|                         | <i>Mother</i>                        | 63 (57.3)    | 47 (42.7) | 2.09 (1.12-4.00, p=0.023) | 1.52 (0.73-3.20, p=0.266)        |
| Participation           | <i>IPP-NICU <math>&lt;</math> 20</i> | 75 (67.0)    | 37 (33.0) | -                         | -                                |
|                         | <i>IPP-NICU <math>\geq</math> 20</i> | 44 (59.5)    | 30 (40.5) | 1.38 (0.75-2.54, p=0.297) | 1.34 (0.66-2.72, p=0.409)        |

Notes: <sup>1</sup> Not graduated = ISCED 0,1,2,3; Graduated = ISCED 4,5,6.

Abbreviations: SOL = Stress Occurrence Level; IPP-NICU = Index of Parental Participation in NICU.

Supp. Table 10. Logistic regression models – factors associated with depression in Italy

| Dependent: EPDS $\geq$ 12 |                                      | Not depressed | Depressed | OR (univariate)           | OR (multivariate)                |
|---------------------------|--------------------------------------|---------------|-----------|---------------------------|----------------------------------|
| Newborn sex               | <i>Female</i>                        | 68 (72.3)     | 26 (27.7) | -                         | -                                |
|                           | <i>Male</i>                          | 56 (60.9)     | 36 (39.1) | 1.68 (0.91-3.14, p=0.098) | 1.70 (0.82-3.58, p=0.153)        |
| Twin                      | <i>No</i>                            | 100 (64.1)    | 56 (35.9) | -                         | -                                |
|                           | <i>Yes</i>                           | 24 (80.0)     | 6 (20.0)  | 0.45 (0.16-1.09, p=0.097) | 0.68 (0.22-1.89, p=0.470)        |
| Intubation                | <i>No</i>                            | 96 (65.3)     | 51 (34.7) | -                         | -                                |
|                           | <i>Yes</i>                           | 28 (71.8)     | 11 (28.2) | 0.74 (0.33-1.57, p=0.446) | 1.14 (0.39-3.29, p=0.812)        |
| Total stay                | $\leq 14$ days                       | 55 (63.2)     | 32 (36.8) | -                         | -                                |
|                           | $> 14$ days                          | 69 (73.4)     | 25 (26.6) | 0.62 (0.33-1.17, p=0.142) | 0.85 (0.39-1.85, p=0.688)        |
| Newborn weight            | $<1500g$                             | 27 (79.4)     | 7 (20.6)  | -                         | -                                |
|                           | $\geq1500g$                          | 97 (63.8)     | 55 (36.2) | 2.19 (0.94-5.75, p=0.086) | 3.36 (0.94-14.46, p=0.076)       |
| Education <sup>1</sup>    | <i>Not graduated</i>                 | 73 (66.4)     | 37 (33.6) | -                         | -                                |
|                           | <i>Graduated</i>                     | 51 (67.1)     | 25 (32.9) | 0.97 (0.52-1.79, p=0.916) | 0.85 (0.40-1.76, p=0.659)        |
| Parental age              | $\geq 35$ years                      | 95 (72.0)     | 37 (28.0) | -                         | -                                |
|                           | $< 35$ years                         | 29 (53.7)     | 25 (46.3) | 2.21 (1.15-4.28, p=0.018) | 1.48 (0.68-3.19, p=0.320)        |
| Working status            | <i>Unemployed</i>                    | 9 (39.1)      | 14 (60.9) | -                         | -                                |
|                           | <i>Employed</i>                      | 115 (70.6)    | 48 (29.4) | 0.27 (0.11-0.65, p=0.004) | 0.60 (0.21-1.69, p=0.332)        |
| Role                      | <i>Father</i>                        | 62 (81.6)     | 14 (18.4) | -                         | -                                |
|                           | <i>Mother</i>                        | 62 (56.4)     | 48 (43.6) | 3.43 (1.75-7.04, p<0.001) | <b>2.93 (1.35-6.65, p=0.008)</b> |
| Participation             | <i>IPP-NICU &lt; 20</i>              | 77 (68.8)     | 35 (31.2) | -                         | -                                |
|                           | <i>IPP-NICU <math>\geq</math> 20</i> | 47 (63.5)     | 27 (36.5) | 1.26 (0.68-2.35, p=0.459) | 0.92 (0.44-1.89, p=0.816)        |

Notes: <sup>1</sup> Not graduated = ISCED 0,1,2,3; Graduated = ISCED 4,5,6.

Abbreviations: EPDS = Edinburgh Postnatal Depression Scale; IPP-NICU = Index of Parental Participation in NICU.



Supp. Table 11. Logistic regression models – factors associated with anxiety in Italy

| Dependent: EPDS-A ≥ 6  |                         | Not anxious | Anxious   | OR (univariate)           | OR (multivariate)                |
|------------------------|-------------------------|-------------|-----------|---------------------------|----------------------------------|
| Newborn sex            | <i>Female</i>           | 72 (76.6)   | 22 (23.4) | -                         | -                                |
|                        | <i>Male</i>             | 69 (75.0)   | 23 (25.0) | 1.09 (0.56-2.14, p=0.799) | 1.28 (0.57-2.92, p=0.552)        |
| Twin                   | <i>No</i>               | 117 (75.0)  | 39 (25.0) | -                         | -                                |
|                        | <i>Yes</i>              | 24 (80.0)   | 6 (20.0)  | 0.75 (0.26-1.87, p=0.559) | 1.35 (0.43-3.92, p=0.591)        |
| Intubation             | <i>No</i>               | 112 (76.2)  | 35 (23.8) | -                         | -                                |
|                        | <i>Yes</i>              | 29 (74.4)   | 10 (25.6) | 1.10 (0.47-2.43, p=0.812) | 1.92 (0.60-6.07, p=0.264)        |
| Total stay             | <i>≤ 14 days</i>        | 64 (73.6)   | 23 (26.4) | -                         | -                                |
|                        | <i>&gt; 14 days</i>     | 77 (81.9)   | 17 (18.1) | 0.61 (0.30-1.24, p=0.178) | 0.75 (0.31-1.75, p=0.506)        |
| Newborn weight         | <i>&lt;1500g</i>        | 28 (82.4)   | 6 (17.6)  | -                         | -                                |
|                        | <i>≥1500g</i>           | 113 (74.3)  | 39 (25.7) | 1.61 (0.66-4.56, p=0.327) | 4.09 (0.99-22.32, p=0.071)       |
| Education <sup>1</sup> | <i>Not graduated</i>    | 80 (72.7)   | 30 (27.3) | -                         | -                                |
|                        | <i>Graduated</i>        | 61 (80.3)   | 15 (19.7) | 0.66 (0.32-1.31, p=0.240) | 0.58 (0.24-1.30, p=0.192)        |
| Parental age           | <i>≥ 35 years</i>       | 108 (81.8)  | 24 (18.2) | -                         | -                                |
|                        | <i>&lt; 35 years</i>    | 33 (61.1)   | 21 (38.9) | 2.86 (1.41-5.81, p=0.003) | 1.90 (0.83-4.31, p=0.122)        |
| Working status         | <i>Unemployed</i>       | 13 (56.5)   | 10 (43.5) | -                         | -                                |
|                        | <i>Employed</i>         | 128 (78.5)  | 35 (21.5) | 0.36 (0.14-0.90, p=0.025) | 0.89 (0.30-2.81, p=0.843)        |
| Role                   | <i>Father</i>           | 66 (86.8)   | 10 (13.2) | -                         | -                                |
|                        | <i>Mother</i>           | 75 (68.2)   | 35 (31.8) | 3.08 (1.46-7.00, p=0.005) | <b>3.03 (1.27-7.83, p=0.016)</b> |
| Participation          | <i>IPP-NICU &lt; 20</i> | 86 (76.8)   | 26 (23.2) | -                         | -                                |
|                        | <i>IPP-NICU ≥ 20</i>    | 55 (74.3)   | 19 (25.7) | 1.14 (0.57-2.25, p=0.701) | 0.77 (0.34-1.72, p=0.533)        |

Notes: <sup>1</sup> Not graduated = ISCED 0,1,2,3; Graduated = ISCED 4,5,6.

Abbreviations: EPDS-A = Edinburgh Postnatal Depression Scale – Anxiety subscale; IPP-NICU = Index of Parental Participation in NICU.

Supp. Table 12. Logistic regression models – factors associated with stress in Brazil

| Dependent: SOL ≥ 3  |                           | Not stressed | Stressed  | OR (univariate)           | adjOR (multivariate)             |
|---------------------|---------------------------|--------------|-----------|---------------------------|----------------------------------|
| Age                 | 18-30                     | 33 (53.2)    | 29 (46.8) | -                         | -                                |
|                     | >30                       | 17 (44.7)    | 21 (55.3) | 1.41 (0.63-3.19, p=0.411) | 1.50 (0.60-3.84, p=0.388)        |
| Gestational weeks   | <34                       | 24 (41.4)    | 34 (58.6) | -                         | -                                |
|                     | ≥ 34                      | 27 (56.2)    | 21 (43.8) | 0.55 (0.25-1.18, p=0.129) | 0.95 (0.26-3.41, p=0.937)        |
| Marital status      | Single/Divorced           | 10 (38.5)    | 16 (61.5) | -                         | -                                |
|                     | Married/Stable union      | 41 (51.2)    | 39 (48.8) | 0.59 (0.23-1.45, p=0.259) | 0.69 (0.22-2.08, p=0.515)        |
| Residence           | Recife/RMR                | 23 (39.7)    | 35 (60.3) | -                         | -                                |
|                     | Interior/Rural area       | 28 (58.3)    | 20 (41.7) | 0.47 (0.21-1.02, p=0.057) | <b>0.33 (0.13-0.84, p=0.023)</b> |
| Family monthly wage | One official minimum wage | 25 (43.1)    | 33 (56.9) | -                         | -                                |
|                     | More than one min. wage   | 26 (56.5)    | 20 (43.5) | 0.58 (0.26-1.27, p=0.175) | 0.62 (0.25-1.53, p=0.296)        |
| Major malformation  | No                        | 35 (47.9)    | 38 (52.1) | -                         | -                                |
|                     | Yes                       | 16 (48.5)    | 17 (51.5) | 0.98 (0.43-2.24, p=0.959) | 1.12 (0.31-4.17, p=0.864)        |
| Surgery             | No                        | 41 (48.2)    | 44 (51.8) | -                         | -                                |
|                     | Yes                       | 10 (47.6)    | 11 (52.4) | 1.02 (0.39-2.71, p=0.960) | 2.58 (0.54-13.39, p=0.243)       |
| Intubation          | No                        | 39 (52.0)    | 36 (48.0) | -                         | -                                |
|                     | Yes                       | 12 (38.7)    | 19 (61.3) | 1.72 (0.74-4.11, p=0.215) | 1.20 (0.39-3.80, p=0.753)        |
| Covid-19 confirmed  | No                        | 29 (56.9)    | 22 (43.1) | -                         | -                                |
|                     | Yes                       | 22 (40.0)    | 33 (60.0) | 1.98 (0.92-4.33, p=0.084) | 1.89 (0.72-5.13, p=0.200)        |
| Total stay          | ≤ 30 days                 | 37 (56.9)    | 28 (43.1) | -                         | -                                |
|                     | > 30 days                 | 14 (34.1)    | 27 (65.9) | 2.55 (1.15-5.85, p=0.024) | 2.26 (0.80-6.67, p=0.130)        |
| Participation       | IPP-NICU < 20             | 26 (44.8)    | 32 (55.2) | -                         | -                                |
|                     | IPP-NICU ≥ 20             | 25 (52.1)    | 23 (47.9) | 0.75 (0.35-1.61, p=0.457) | 0.56 (0.19-1.55, p=0.268)        |

Abbreviations: SOL = Stress Occurrence Level; RMR = Recife's metropolitan region; IPP-NICU = Index of Parental Participation in NICU.

Supp. Table 13. Logistic regression models – factors associated with depression in Brazil

| Dependent: EPDS ≥ 13       |                                  | Not depressed | Depressed | OR (univariate)           | adjOR (multivariate)      |
|----------------------------|----------------------------------|---------------|-----------|---------------------------|---------------------------|
| <b>Age</b>                 | <i>18-30</i>                     | 38 (61.3)     | 24 (38.7) | -                         | -                         |
|                            | <i>&gt;30</i>                    | 26 (68.4)     | 12 (31.6) | 0.73 (0.30-1.70, p=0.472) | 0.58 (0.22-1.44, p=0.247) |
| <b>Gestational weeks</b>   | <i>&lt;34</i>                    | 38 (65.5)     | 20 (34.5) | -                         | -                         |
|                            | <i>≥ 34</i>                      | 30 (62.5)     | 18 (37.5) | 1.14 (0.51-2.54, p=0.747) | 0.85 (0.23-3.04, p=0.806) |
| <b>Marital status</b>      | <i>Single/Divorced</i>           | 16 (61.5)     | 10 (38.5) | -                         | -                         |
|                            | <i>Married/Stable union</i>      | 52 (65.0)     | 28 (35.0) | 0.86 (0.35-2.20, p=0.749) | 1.17 (0.41-3.50, p=0.773) |
| <b>Residence</b>           | <i>Recife/RMR</i>                | 32 (55.2)     | 26 (44.8) | -                         | -                         |
|                            | <i>Interior/Rural area</i>       | 36 (75.0)     | 12 (25.0) | 0.41 (0.17-0.93, p=0.036) | 0.40 (0.15-1.01, p=0.057) |
| <b>Family monthly wage</b> | <i>One official minimum wage</i> | 37 (63.8)     | 21 (36.2) | -                         | -                         |
|                            | <i>More than one min. wage</i>   | 30 (65.2)     | 16 (34.8) | 0.94 (0.41-2.11, p=0.880) | 1.30 (0.53-3.26, p=0.574) |
| <b>Major malformation</b>  | <i>No</i>                        | 48 (65.8)     | 25 (34.2) | -                         | -                         |
|                            | <i>Yes</i>                       | 20 (60.6)     | 13 (39.4) | 1.25 (0.53-2.91, p=0.609) | 1.74 (0.50-6.16, p=0.383) |
| <b>Surgery</b>             | <i>No</i>                        | 54 (63.5)     | 31 (36.5) | -                         | -                         |
|                            | <i>Yes</i>                       | 14 (66.7)     | 7 (33.3)  | 0.87 (0.30-2.33, p=0.788) | 0.85 (0.18-3.97, p=0.837) |
| <b>Intubation</b>          | <i>No</i>                        | 48 (64.0)     | 27 (36.0) | -                         | -                         |
|                            | <i>Yes</i>                       | 20 (64.5)     | 11 (35.5) | 0.98 (0.40-2.32, p=0.960) | 1.04 (0.33-3.19, p=0.952) |
| <b>Covid-19 confirmed</b>  | <i>No</i>                        | 33 (64.7)     | 18 (35.3) | -                         | -                         |
|                            | <i>Yes</i>                       | 35 (63.6)     | 20 (36.4) | 1.05 (0.47-2.33, p=0.909) | 1.03 (0.39-2.74, p=0.957) |
| <b>Total stay</b>          | <i>≤ 30 days</i>                 | 43 (66.2)     | 22 (33.8) | -                         | -                         |
|                            | <i>&gt; 30 days</i>              | 25 (61.0)     | 16 (39.0) | 1.25 (0.55-2.82, p=0.588) | 1.18 (0.42-3.35, p=0.754) |
| <b>Participation</b>       | <i>IPP-NICU &lt; 20</i>          | 38 (65.5)     | 20 (34.5) | -                         | -                         |
|                            | <i>IPP-NICU ≥ 20</i>             | 30 (62.5)     | 18 (37.5) | 1.14 (0.51-2.54, p=0.747) | 1.13 (0.41-3.13, p=0.807) |

Abbreviations: EPDS = Edinburgh Postnatal Depression Scale; RMR = Recife's metropolitan region; IPP-NICU = Index of Parental Participation in NICU.

Supp. Table 14. Logistic regression models – factors associated with anxiety in Brazil

| Dependent: EPDS-A $\geq$ 6 |                           | Not anxious | Anxious   | OR (univariate)           | adjOR (multivariate)      |
|----------------------------|---------------------------|-------------|-----------|---------------------------|---------------------------|
| Age                        | 18-30                     | 42 (67.7)   | 20 (32.3) | -                         | -                         |
|                            | >30                       | 30 (78.9)   | 8 (21.1)  | 0.56 (0.21-1.40, p=0.229) | 0.46 (0.16-1.24, p=0.139) |
| Gestational weeks          | <34                       | 42 (72.4)   | 16 (27.6) | -                         | -                         |
|                            | $\geq$ 34                 | 34 (70.8)   | 14 (29.2) | 1.08 (0.46-2.53, p=0.857) | 0.96 (0.24-3.89, p=0.956) |
| Marital status             | Single/Divorced           | 16 (61.5)   | 10 (38.5) | -                         | -                         |
|                            | Married/Stable union      | 60 (75.0)   | 20 (25.0) | 0.53 (0.21-1.39, p=0.189) | 0.65 (0.22-1.99, p=0.442) |
| Residence                  | Recife/RMR                | 39 (67.2)   | 19 (32.8) | -                         | -                         |
|                            | Interior/Rural area       | 37 (77.1)   | 11 (22.9) | 0.61 (0.25-1.44, p=0.265) | 0.71 (0.26-1.89, p=0.492) |
| Family monthly wage        | One official minimum wage | 40 (69.0)   | 18 (31.0) | -                         | -                         |
|                            | More than one min. wage   | 35 (76.1)   | 11 (23.9) | 0.70 (0.28-1.66, p=0.422) | 0.99 (0.37-2.62, p=0.984) |
| Major malformation         | No                        | 52 (71.2)   | 21 (28.8) | -                         | -                         |
|                            | Yes                       | 24 (72.7)   | 9 (27.3)  | 0.93 (0.36-2.29, p=0.874) | 1.00 (0.26-3.67, p=0.996) |
| Surgery                    | No                        | 60 (70.6)   | 25 (29.4) | -                         | -                         |
|                            | Yes                       | 16 (76.2)   | 5 (23.8)  | 0.75 (0.23-2.15, p=0.611) | 1.05 (0.19-5.47, p=0.953) |
| Intubation                 | No                        | 54 (72.0)   | 21 (28.0) | -                         | -                         |
|                            | Yes                       | 22 (71.0)   | 9 (29.0)  | 1.05 (0.40-2.61, p=0.915) | 1.02 (0.30-3.35, p=0.977) |
| Covid-19 confirmed         | No                        | 38 (74.5)   | 13 (25.5) | -                         | -                         |
|                            | Yes                       | 38 (69.1)   | 17 (30.9) | 1.31 (0.56-3.10, p=0.537) | 1.26 (0.45-3.58, p=0.658) |
| Total stay                 | $\leq$ 30 days            | 48 (73.8)   | 17 (26.2) | -                         | -                         |
|                            | > 30 days                 | 28 (68.3)   | 13 (31.7) | 1.31 (0.55-3.10, p=0.537) | 1.29 (0.43-3.95, p=0.649) |
| Participation              | IPP-NICU < 20             | 42 (72.4)   | 16 (27.6) | -                         | -                         |
|                            | IPP-NICU $\geq$ 20        | 34 (70.8)   | 14 (29.2) | 1.08 (0.46-2.53, p=0.857) | 1.17 (0.40-3.48, p=0.768) |

Abbreviations: EPDS-A = Edinburgh Postnatal Depression Scale – Anxiety subscale; RMR = Recife’s metropolitan region; IPP-NICU = Index of Parental Participation in NICU.

Supp. Table 15. Logistic regression models – factors associated with stress in Tanzania

| Dependent: SOL $\geq$ 3      |                                      | Not stressed | Stressed | OR (univariate)            | adjOR (multivariate)       |
|------------------------------|--------------------------------------|--------------|----------|----------------------------|----------------------------|
| <b>Education<sup>1</sup></b> | No schooling or primary              | 139 (95.9)   | 6 (4.1)  | -                          | -                          |
|                              | Secondary or higher                  | 75 (94.9)    | 4 (5.1)  | 1.24 (0.31-4.46, p=0.749)  | 1.60 (0.35-6.78, p=0.523)  |
| <b>Parental age (years)</b>  | <25                                  | 99 (95.2)    | 5 (4.8)  | -                          | -                          |
|                              | $\geq$ 25                            | 115 (95.8)   | 5 (4.2)  | 0.86 (0.23-3.18, p=0.817)  | 1.06 (0.25-4.80, p=0.932)  |
| <b>Working status</b>        | Working data                         | 175 (95.6)   | 8 (4.4)  | -                          | -                          |
|                              | Housewife/Un-employed/no data        | 39 (95.1)    | 2 (4.9)  | 1.12 (0.17-4.69, p=0.887)  | 1.25 (0.17-6.42, p=0.804)  |
| <b>Sex</b>                   | Female                               | 111 (97.4)   | 3 (2.6)  | -                          | -                          |
|                              | Male                                 | 102 (93.6)   | 7 (6.4)  | 2.54 (0.69-12.02, p=0.185) | 2.70 (0.70-13.13, p=0.169) |
| <b>Newborn weight</b>        | $\geq$ 2500 g                        | 120 (95.2)   | 6 (4.8)  | -                          | -                          |
|                              | <2500 g                              | 93 (95.9)    | 4 (4.1)  | 0.86 (0.21-3.10, p=0.820)  | 0.69 (0.14-3.12, p=0.629)  |
| <b>Total stay</b>            | $\leq$ 7 days                        | 126 (96.2)   | 5 (3.8)  | -                          | -                          |
|                              | > 7 days                             | 88 (94.6)    | 5 (5.4)  | 1.43 (0.39-5.29, p=0.579)  | 1.23 (0.29-5.15, p=0.773)  |
| <b>Unit</b>                  | NICU                                 | 151 (94.4)   | 9 (5.6)  | -                          | -                          |
|                              | Semi-intensive care                  | 62 (98.4)    | 1 (1.6)  | 0.27 (0.01-1.48, p=0.220)  | 0.23 (0.01-1.46, p=0.188)  |
| <b>Participation</b>         | <i>IPP-NICU &lt; 20</i>              | 189 (96.4)   | 7 (3.6)  | -                          | -                          |
|                              | <i>IPP-NICU <math>\geq</math> 20</i> | 25 (89.3)    | 3 (10.7) | 3.24 (0.67-12.50, p=0.104) | 3.51 (0.63-16.72, p=0.121) |

Notes: variable role and gestational age was removed because of extreme results. <sup>1</sup>No schooling or primary education = ISCED 0,1; Secondary or higher education: ISCED 2,3,4,5,6.

Abbreviations: IPP-NICU = Index of Parental Participation in NICU, NICU = neonatal intensive care unit; SOL = stress occurrence level.

Supp. Table 16. Logistic regression models – factors associated with depression in Tanzania

| Dependent: EPDS≥13     |                               | Not depressed | Depressed  | OR (univariate)           | adjOR (multivariate)      |
|------------------------|-------------------------------|---------------|------------|---------------------------|---------------------------|
| Education <sup>1</sup> | No schooling or primary       | 61 (42.4)     | 83 (57.6)  | -                         | -                         |
|                        | Secondary or higher           | 45 (57.0)     | 34 (43.0)  | 0.56 (0.32-0.96, p=0.038) | 0.57 (0.31-1.02, p=0.061) |
| Parental age (years)   | <25                           | 48 (46.6)     | 55 (53.4)  | -                         | -                         |
|                        | ≥25                           | 58 (48.3)     | 62 (51.7)  | 0.93 (0.55-1.58, p=0.796) | 0.81 (0.45-1.46, p=0.485) |
| Working status         | Working data                  | 87 (47.5)     | 96 (52.5)  | -                         | -                         |
|                        | Housewife/Un-employed/no data | 19 (47.5)     | 21 (52.5)  | 1.00 (0.50-2.00, p=0.996) | 0.94 (0.43-2.04, p=0.870) |
| Newborn sex            | Female                        | 54 (47.4)     | 60 (52.6)  | -                         | -                         |
|                        | Male                          | 52 (47.7)     | 57 (52.3)  | 0.99 (0.58-1.67, p=0.960) | 1.07 (0.62-1.86, p=0.804) |
| Gestational age        | <27 weeks                     | 2 (33.3)      | 4 (66.7)   | -                         | -                         |
|                        | 27-32 weeks                   | 17 (45.9)     | 20 (54.1)  | 0.59 (0.07-3.41, p=0.567) | 0.49 (0.06-2.99, p=0.452) |
|                        | 32-37 weeks                   | 20 (66.7)     | 10 (33.3)  | 0.25 (0.03-1.51, p=0.144) | 0.23 (0.03-1.52, p=0.141) |
|                        | >37 weeks                     | 67 (44.7)     | 83 (55.3)  | 0.62 (0.08-3.27, p=0.587) | 0.73 (0.09-4.32, p=0.739) |
| Newborn weight         | ≥ 2500 g                      | 62 (49.2)     | 64 (50.8)  | -                         | -                         |
|                        | <2500 g                       | 44 (45.4)     | 53 (54.6)  | 1.17 (0.69-1.99, p=0.569) | 1.52 (0.71-3.32, p=0.283) |
| Total stay             | ≤ 7 days                      | 61 (46.9)     | 69 (53.1)  | -                         | -                         |
|                        | > 7 days                      | 45 (48.4)     | 48 (51.6)  | 0.94 (0.55-1.61, p=0.829) | 0.93 (0.51-1.68, p=0.808) |
| Unit                   | NICU                          | 74 (46.2)     | 86 (53.8)  | -                         | -                         |
|                        | Semi-intensive care           | 32 (50.8)     | 31 (49.2)  | 0.83 (0.46-1.50, p=0.541) | 1.01 (0.53-1.94, p=0.982) |
| Participation          | IPP-NICU < 20                 | 13 (48.1)     | 14 (51.9)  | -                         | -                         |
|                        | IPP-NICU ≥ 20                 | 93 (47.4)     | 103 (52.6) | 1.03 (0.45-2.31, p=0.946) | 1.05 (0.44-2.48, p=0.909) |

Abbreviations: EPDS = Edinburgh Postnatal Depression Scale; IPP-NICU = Index of Parental Participation in NICU, NICU = neonatal intensive care unit.

Notes: variable role was excluded because of extreme results. <sup>1</sup>No schooling or primary education = ISCED 0,1; Secondary or higher education: ISCED 2,3,4,5,6.

Supp. Table 17. Logistic regression models – factors associated with anxiety in Tanzania

| Dependent: EPDS - A ≥ 6 |                               | Not anxious | Anxious   | OR (univariate)           | adjOR (multivariate)      |
|-------------------------|-------------------------------|-------------|-----------|---------------------------|---------------------------|
| Education <sup>1</sup>  | No schooling or primary       | 103 (71.5)  | 41 (28.5) | -                         | -                         |
|                         | Secondary or higher           | 55 (70.5)   | 23 (29.5) | 1.05 (0.57-1.92, p=0.873) | 1.31 (0.67-2.56, p=0.427) |
| Parental age (years)    | <25                           | 78 (75.7)   | 25 (24.3) | -                         | -                         |
|                         | ≥25                           | 80 (67.2)   | 39 (32.8) | 1.52 (0.85-2.77, p=0.164) | 2.04 (1.04-4.09, p=0.040) |
| Working status          | Working data                  | 132 (72.5)  | 50 (27.5) | -                         | -                         |
|                         | Housewife/Un-employed/no data | 26 (65.0)   | 14 (35.0) | 1.42 (0.67-2.91, p=0.343) | 2.33 (0.99-5.53, p=0.052) |
| Sex                     | Female                        | 77 (68.1)   | 36 (31.9) | -                         | -                         |
|                         | Male                          | 81 (74.3)   | 28 (25.7) | 0.74 (0.41-1.32, p=0.311) | 0.72 (0.39-1.33, p=0.300) |
| Gestational age         | <27 weeks                     | 4 (66.7)    | 2 (33.3)  | -                         | -                         |
|                         | 27-32 weeks                   | 27 (73.0)   | 10 (27.0) | 0.74 (0.12-5.94, p=0.750) | 0.86 (0.14-7.20, p=0.879) |
|                         | 32-37 weeks                   | 25 (83.3)   | 5 (16.7)  | 0.40 (0.06-3.44, p=0.357) | 0.53 (0.07-4.84, p=0.542) |
|                         | >37 weeks                     | 102 (68.5)  | 47 (31.5) | 0.92 (0.17-6.81, p=0.926) | 1.21 (0.20-9.71, p=0.839) |
| Newborn weight          | ≥ 2500 g                      | 89 (71.2)   | 36 (28.8) | -                         | -                         |
|                         | <2500 g                       | 69 (71.1)   | 28 (28.9) | 1.00 (0.56-1.80, p=0.991) | 1.63 (0.72-3.69, p=0.243) |
| Total stay              | ≤ 7 days                      | 85 (65.9)   | 44 (34.1) | -                         | -                         |
|                         | > 7 days                      | 73 (78.5)   | 20 (21.5) | 0.53 (0.28-0.97, p=0.042) | 0.43 (0.21-0.84, p=0.016) |
| Unit                    | NICU                          | 112 (70.0)  | 48 (30.0) | -                         | -                         |
|                         | Semi-intensive care           | 46 (74.2)   | 16 (25.8) | 0.81 (0.41-1.55, p=0.536) | 0.59 (0.27-1.24, p=0.177) |
| Participation           | IPP-NICU < 20                 | 20 (74.1)   | 7 (25.9)  | -                         | -                         |
|                         | IPP-NICU ≥ 20                 | 138 (70.8)  | 57 (29.2) | 1.18 (0.49-3.15, p=0.723) | 1.04 (0.40-2.96, p=0.935) |

Abbreviations: EPDS-A = Edinburgh Postnatal Depression Scale- Anxiety subscale; IPP-NICU = Index of Parental Participation in NICU, NICU = neonatal intensive care unit.

Notes: variable role was excluded because of extreme results. <sup>1</sup>No schooling or primary education = ISCED 0,1; Secondary or higher education: ISCED 2,3,4,5,6.
